# Supplementary material for: Microwave-assisted synthesis and in-situ self-assembly of coaxial Ag/C nanocables
Source: Royal Society of Chemistry journal article supplement (doi:10.1039/b502493e), 2005-01-01
Supplement: b502493e.pdf [file b502493e.pdf]

## Microwave-assisted synthesis and in-situ self-assembly of coaxial Ag/C nanocables\*\*

Jimmy C. Yu,\* Xianluo Hu, Quan Li and Lizhi Zhang

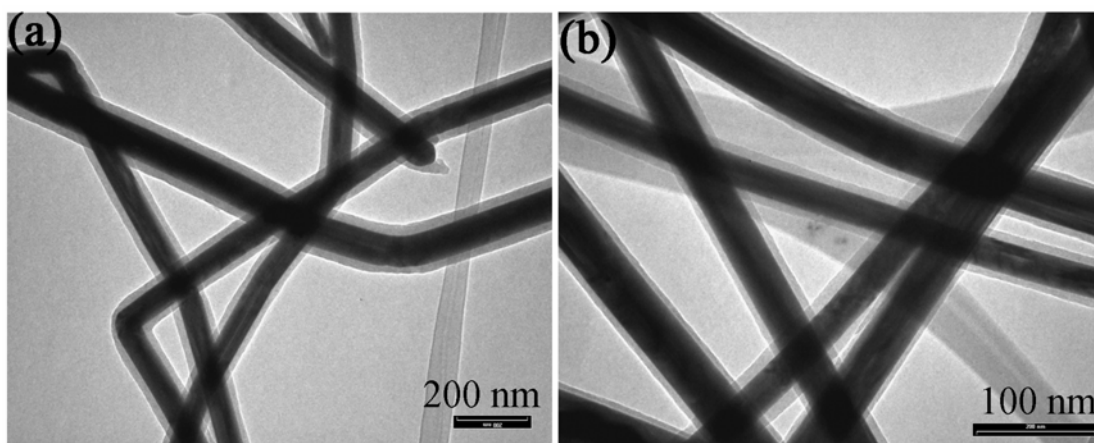

**Fig. S1** TEM images of Ag/C nanocables synthesized using the MAHRC method. (a) and (b) are for the same product as shown in Fig. 1.

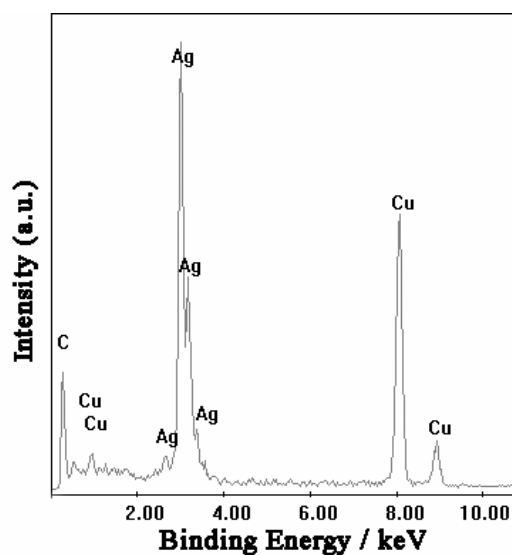

**Fig. S2** A typical EDX spectrum of taken from a single nanocable, suggesting the nanocable is composed of Ag and C only.

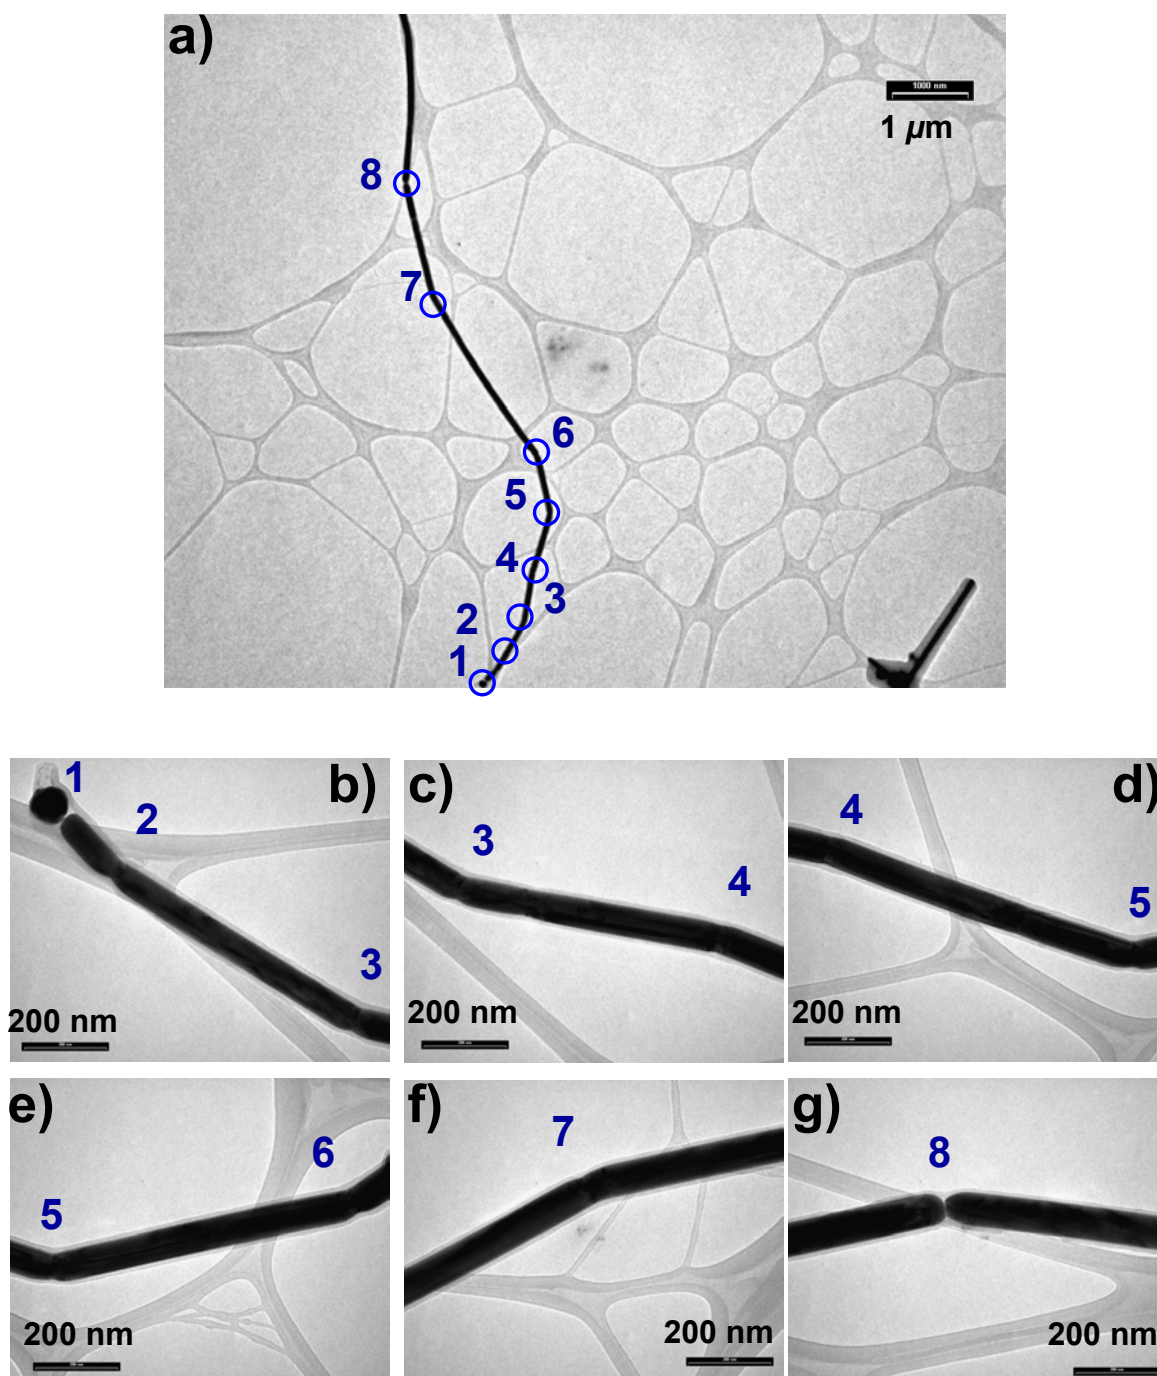

**Fig. S3** TEM images of interconnected Ag/C nanocables. (a) A representative TEM image showing an individual chainlike structure with a length up to  $\sim 10 \mu\text{m}$ . There exist 8 junctions (labelled with circles) in this chainlike structure. (b)–(g) High-magnification TEM images showing more details for these junctions (labelled with Arab numbers).
